# Supplementary material for: fs(1)h controls metabolic and immune function and enhances survival via AKT and FOXO in Drosophila
Source: PubMed Central journal article supplement (PMC6505478; doi:10.1242/dmm.037259), 2019-04-04
Supplement: dmm-12-037259-s1.pdf [file dmm-12-037259-s1.pdf]

**A**

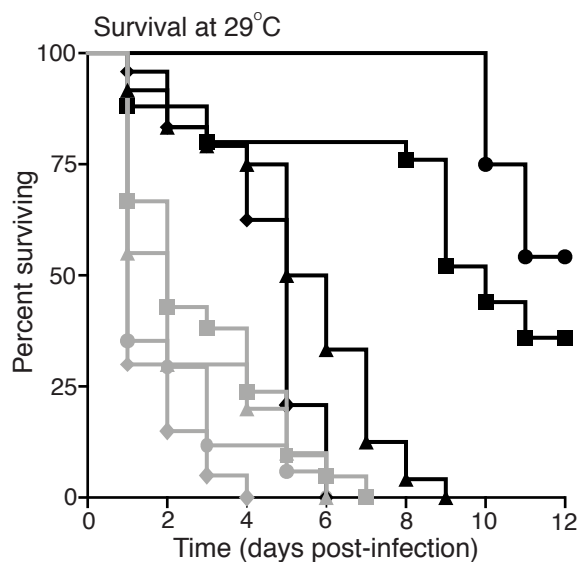

- c564>0 Uninjected
- c564>0 PBS
- ▲ c564>0 *L monocytogenes*
- ◆ c564>0 *F novicida*
- c564>fs(1)h-IR Uninjected
- c564>fs(1)h-IR PBS
- ▲ c564>fs(1)h-IR *L monocytogenes*
- ◆ c564>fs(1)h-IR *F novicida*

**B**

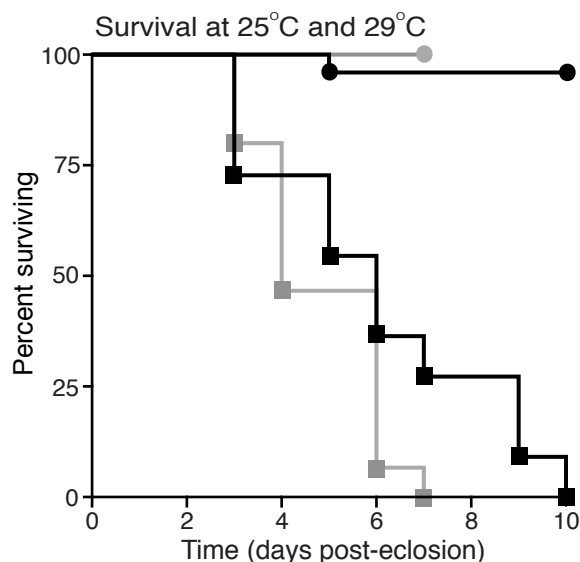

- c564>0 (25°C)
- c564>fs(1)h-IR II (25°C)
- c564>0 (29°C)
- c564>fs(1)h-IR II (29°C)

**C**

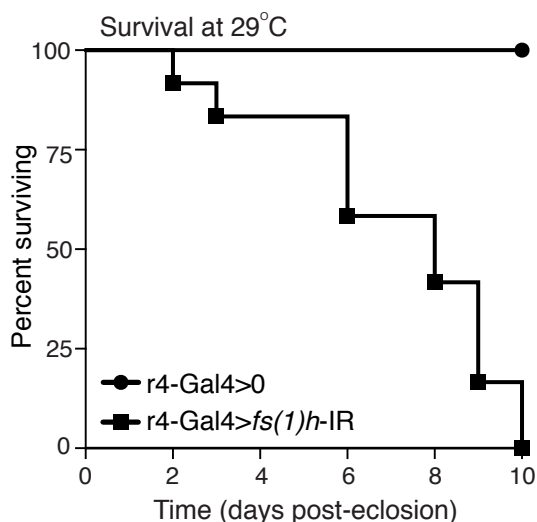

- r4-Gal4>0
- r4-Gal4>fs(1)h-IR

**D**

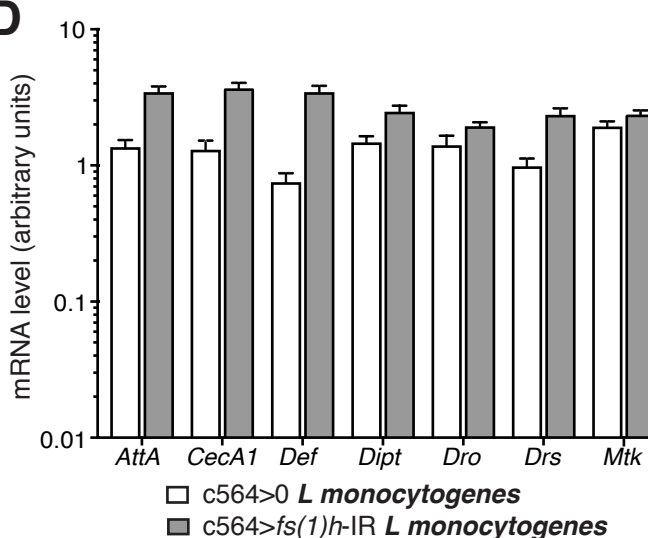

- c564>0 *L monocytogenes*
- c564>fs(1)h-IR *L monocytogenes*

**E**

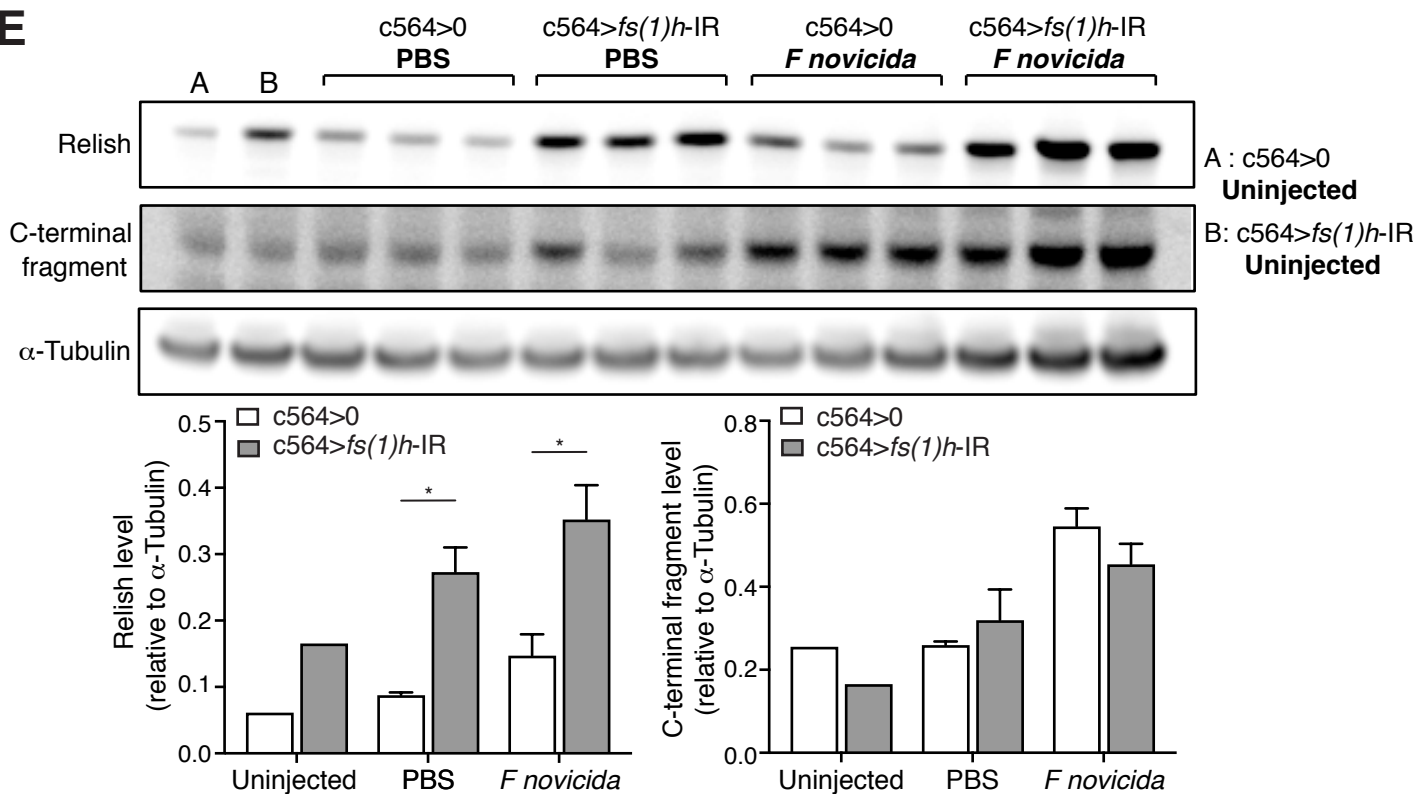

**Figure S1.** (A) Survival of fat body knockdown of *fs(1)h* (KK108662) compared to controls, either uninfected, PBS injected, or infected with *L monocytogenes* or *F novicida*. (B) Survival of flies with fat body knockdown of *fs(1)h* using a different RNAi line (GD51227) compared to driver-only controls. (C) Survival of flies with *fs(1)h* knocked down in fat body under the control of r4-Gal4. (D) Expression of antimicrobial peptide (AMP) genes in *Listeria monocytogenes*-infected 5-7 day old male control (c564>0) and *fs(1)h* fat body knockdown (c564>*fs(1)h-IR*) flies. Values shown as mean + SEM. (E) Relish protein levels in *fs(1)h* knockdowns and control animals, uninfected, PBS-injected, or infected with *Francisella novicida*.

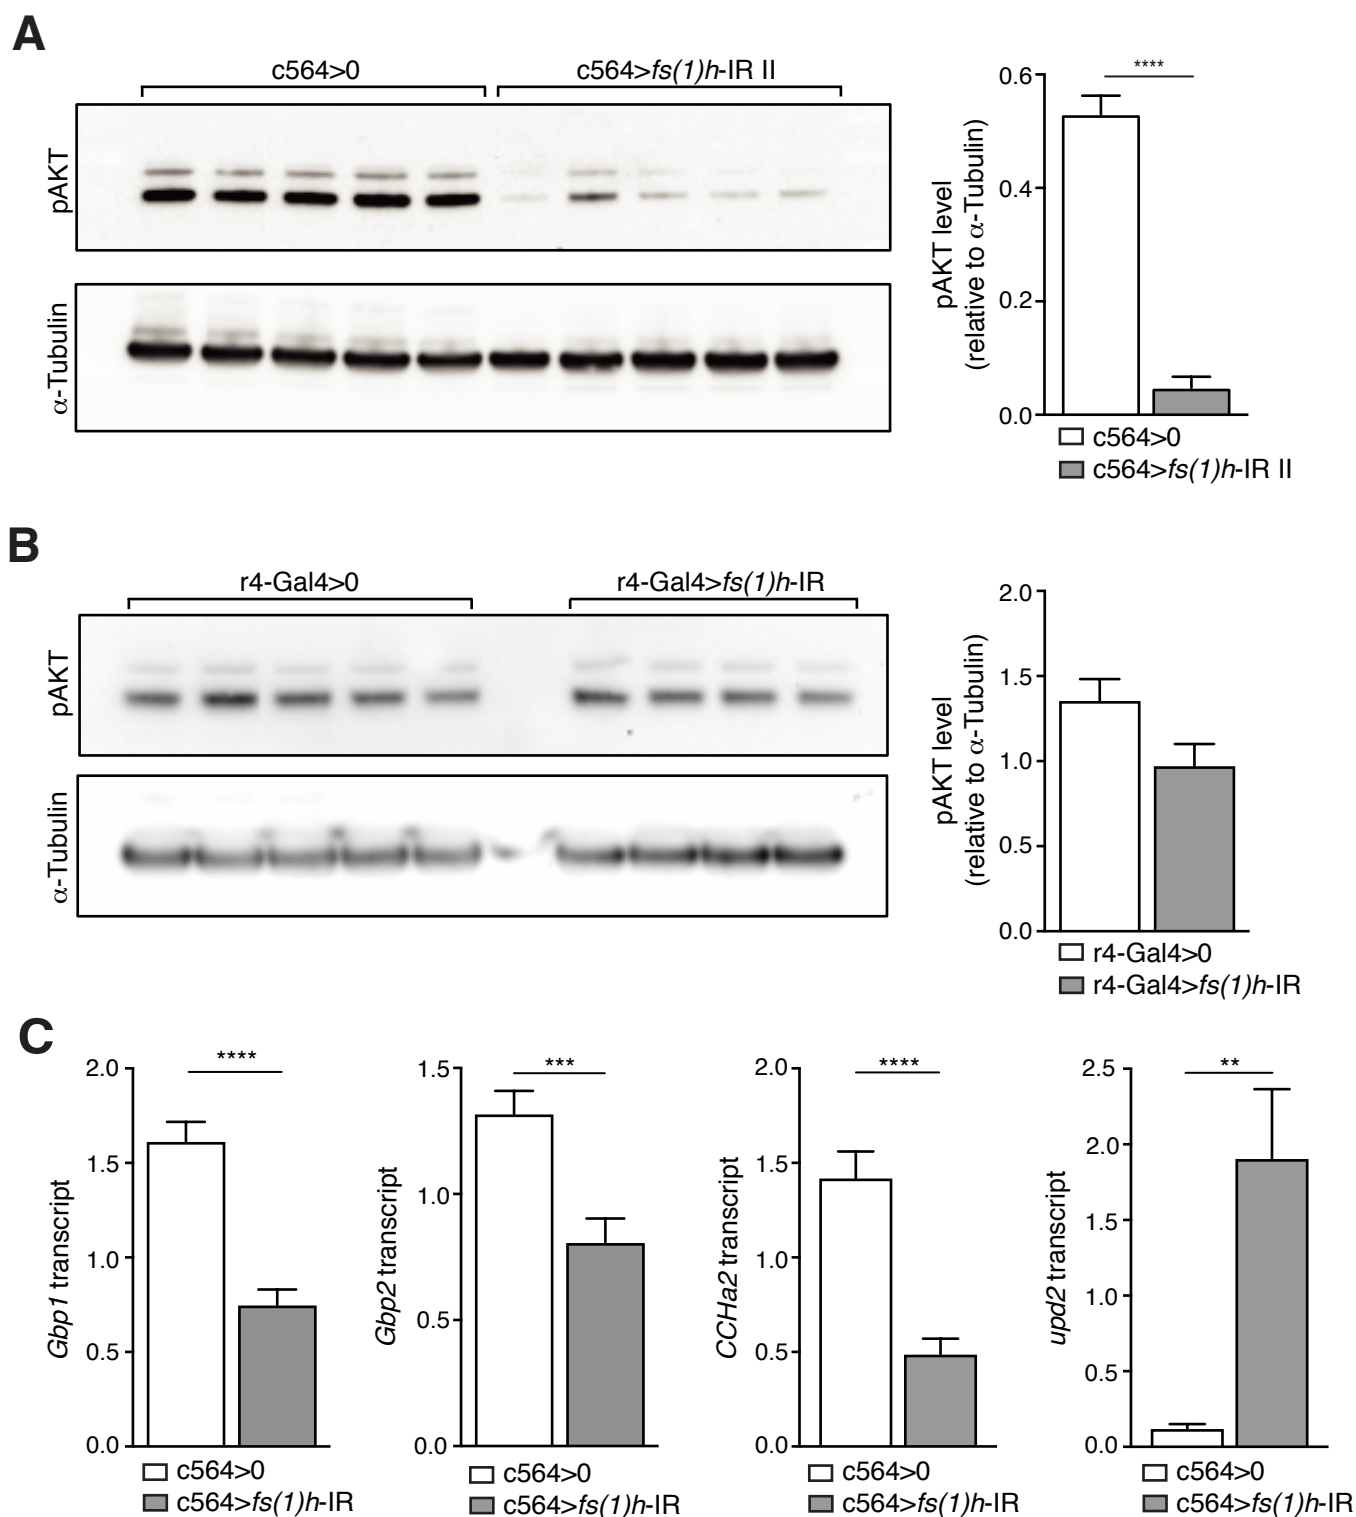

**Figure S2.** (A) Western blot analysis of AKT phosphorylation in control and *fs(1)h* (GD51227) fat body knockdown flies. Values represented as intensity relative to  $\alpha$ -Tubulin, shown as mean+SEM, genotypes were compared using unpaired two-tailed t-test (\*\*\*\* $p$ <0.0001). (B) Western blot analysis of AKT phosphorylation in flies with *fs(1)h* knockdown driven by r4-Gal4. Values represented as intensity relative to  $\alpha$ -Tubulin. (C) Expression of insulin-regulatory secreted factors in isolated fat body from control and *fs(1)h* fat body knockdown flies, shown as mean + SEM. Normalised to expression of  $\alpha$ -tubulin as a loading control.

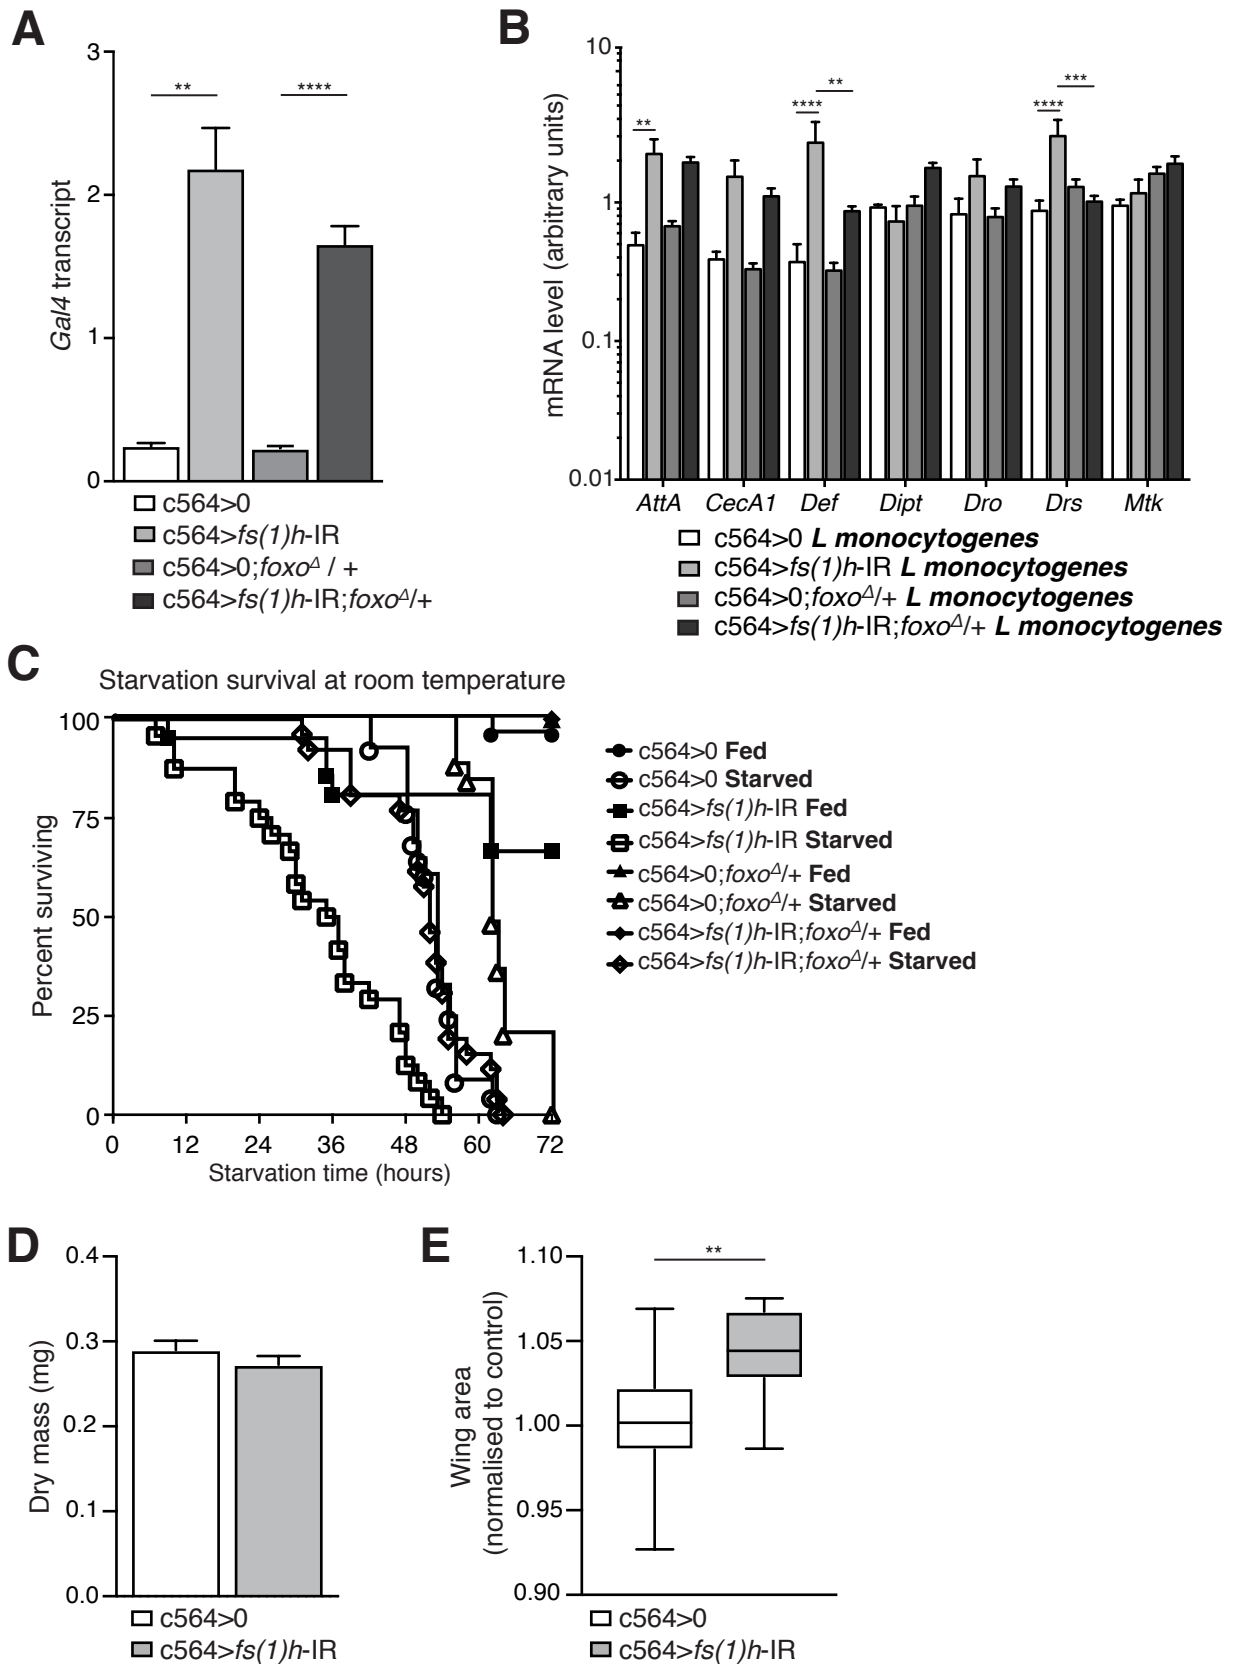

**Figure S3.** (A) *Gal4* expression in *fs(1)h* knockdowns and controls, wild-type or heterozygous for *foxo*. Data shown as mean + SEM; genotypes were compared using unpaired two-tailed t-test (\*\* $p < 0.01$ , \*\*\*\* $p < 0.0001$ ). (B) Expression of antimicrobial peptide (AMP) genes in *Listeria monocytogenes*-infected 5-7 day old male control (*c564>0*) and *fs(1)h* fat body knockdown (*c564>fs(1)h-IR*) flies, either wild-type or heterozygous for *foxo*. Values shown as mean + SEM. (C) Starvation survival of control and *fs(1)h* fat body knockdown flies, either wild-type or heterozygous for *foxo*. Carried out at room temperature on 5-7 day old flies. (D) Dry mass per fly of control and *fs(1)h* fat body knockdown animals. Values shown are mean + SEM. (E) Wing areas of control and *fs(1)h* fat body knockdown animals, normalised to the mean of the controls. The center line represents the median of the measurement; the extent of the box, the interquartile range; the whiskers, the furthest possible outliers. \*\* $p < 0.01$  by Wilcoxon rank-sum test.

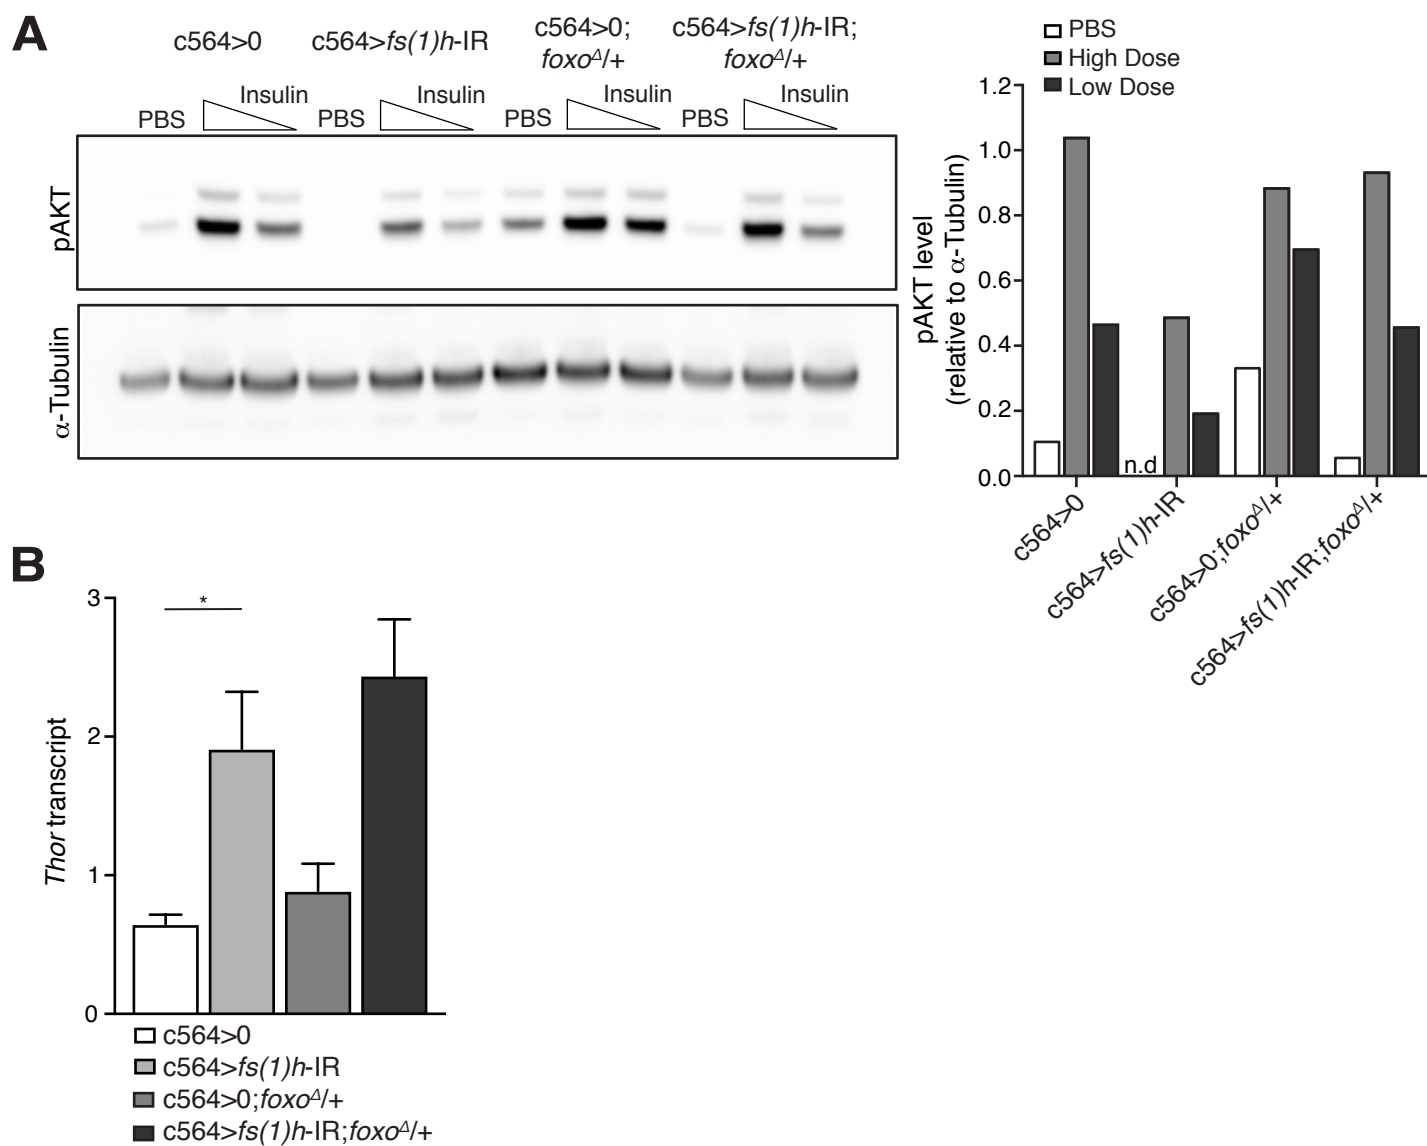

**Figure S4.** (A) Western blot analysis of AKT phosphorylation following injection with PBS or a high (320 pg/fly) or low (64 pg/fly) dose of human insulin. Values relative to  $\alpha$ -Tubulin, shown as mean. (B) Expression of *Thor* in control and *fs(1)h* knockdown flies, either heterozygous or wild-type for *foxo*.

Table S1: qRT-PCR primers used in this study:

| <b>Gene</b>                        | <b>Left</b>            | <b>Right</b>            |
|------------------------------------|------------------------|-------------------------|
| <i>AttA</i>                        | CACAATGTGGTGGGTCAGG    | GGCACCATGACCAGCATT      |
| <i>Bmm</i>                         | GTCTCCTCTGCGATTTGCCAT  | CTGAAGGGACCCAGGGAGTA    |
| <i>CCHa2</i>                       | TGCTACTGGTCGTTATCTGCAC | TAGGCCTGGCATCCCTTT      |
| <i>CecA1</i>                       | TCTTCGTTTTTCGTCGCTCTC  | CTTGTTGAGCGATTCCCAGT    |
| <i>CG10702</i>                     | GGACTCCCTGCAGACCAA     | AGACCGATGGGTTTCGTTTCT   |
| <i>conv</i>                        | TTAGGGGTATGCGTTTCCTC   | GACCAATATCCGTGAGCACAT   |
| <i>Def</i>                         | TTCTCGTGGCTATCGCTTTT   | GGAGAGTAGGTCGCATGTGG    |
| <i>Dipt</i>                        | ACCGCAGTACCCACTCAATC   | CCCAAGTGCTGTCCATATCC    |
| <i>Dro</i>                         | CCATCGAGGATCACCTGACT   | CTTAGGCGGGCAGAATG       |
| <i>Drs</i>                         | GTACTIONTTTCGCCCTCTTCG | CTTGCACACACGACGACAG     |
| <i>foxo</i>                        | ACTTTCCCGTGGGCAATC     | CGCCGTAGCTCATCTCCT      |
| <i>Gal4</i>                        | GCAGCATTCTGGAACAAAGA   | GGACAATTGGATCTCCCAAG    |
| <i>Gbp1</i>                        | CAGCACAGAACAGATCACCAG  | GCAGCACAGTGGTGTTTTCA    |
| <i>Gbp2</i>                        | AAACGGCGGACATGGATA     | TGGAAAACGACCGAAGACA     |
| <i>Hnf4</i>                        | AGGAAATGTTGTTGGGAGGA   | GGGTGGGACTCTGGTAGTCA    |
| <i>Hsl</i>                         | CTTGGAATACTTGAGGGGTTG  | AGATTTGATGCAGTTCTTTGAGC |
| <i>ImpL2</i>                       | GCCGATACCTTCGTGTATCC   | TTTCCGTCGTCAATCCAATAG   |
| <i>Mtk</i>                         | TCTTGAGCGATTTTTCTGG    | TCTGCCAGCACTGATGTAGC    |
| <i>Plin1</i>                       | GCGTTCTATGGTAGCCTTCAG  | GCGTCCGGATAGAAAGCTG     |
| <i>Plin2</i>                       | GCAGAATGGCAAGAGTTCTGA  | ACTGTGTGTAGGACTGGATCCTC |
| <i>Sdr</i>                         | GCAGCACTTTTCCCTTAAACA  | GGGCGAAGTTGTGTCGTATT    |
| <i>Thor</i>                        | CAGGAAGGTTGTCATCTCGGA  | GGAGTGGTGGAGTAGAGGGTT   |
| <i>upd2</i>                        | CGGAACATCACGATGAGCGAAT | TCGGCAGGAACTTGTACTCG    |
| <i><math>\alpha</math>-Tubulin</i> | GATTCCGGTGACGGTGAG     | GATGCACACCTATCCGCTCT    |
